# Supplementary material for: Quantum calculations of the photoelectron spectra of the OH−·NH3 anion: implications for OH + NH3 → H2O + NH2 reaction dynamics
Source: Royal Society of Chemistry journal article supplement (doi:10.1039/d0cp06514e), 2021-01-01
Supplement: d0cp06514e1.pdf [file d0cp06514e1.pdf]

## Supporting Information

### Quantum calculations of photoelectron spectra of the $\text{OH}^-\cdot\text{NH}_3$ anion: Implications for $\text{OH} + \text{NH}_3 \rightarrow \text{H}_2\text{O} + \text{NH}_2$ reaction dynamics

Kohei Saito, Yutaro Sugiura, Takaaki Miyazaki, Yukinobu Takahashi, Toshiyuki Takayanagi\*

Department of Chemistry, Saitama University, Shimo-Okubo 255, Sakura-ku, Saitama City,  
Saitama 338-8570, Japan

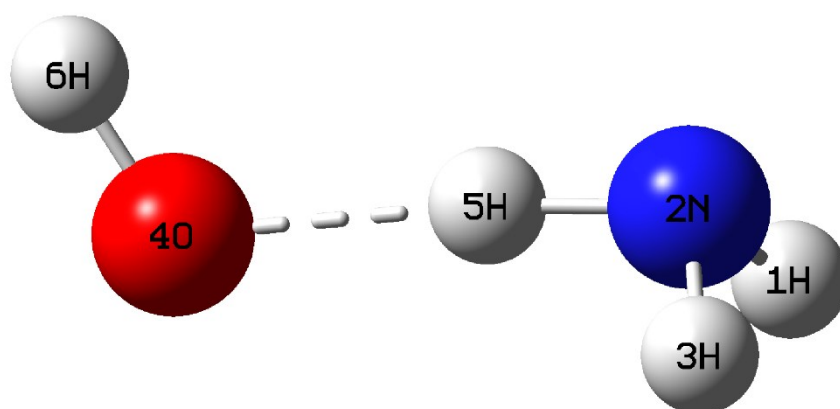

$$\begin{aligned} Z_1 &= R(\text{N}_2\text{-H}_1) \\ Z_2 &= R(\text{H}_3\text{-N}_2) & Z_6 &= \theta(\text{H}_3\text{-N}_2\text{-H}_1) \\ Z_3 &= R(\text{O}_4\text{-N}_2) & Z_7 &= \theta(\text{O}_4\text{-N}_2\text{-H}_1) & Z_{10} &= \phi(\text{H}_4\text{-N}_2\text{-H}_1\text{-H}_3) \\ Z_4 &= R(\text{H}_5\text{-N}_2) & Z_8 &= \theta(\text{H}_5\text{-N}_2\text{-H}_1) & Z_{11} &= \phi(\text{H}_5\text{-N}_2\text{-H}_1\text{-H}_3) \\ Z_5 &= R(\text{H}_6\text{-O}_4) & Z_9 &= \theta(\text{H}_6\text{-O}_4\text{-N}_2) & s &= \phi(\text{H}_6\text{-O}_4\text{-N}_2\text{-H}_1) \end{aligned}$$

**Figure S1** Definition of internal coordinates used in the anionic potential energy surface construction.

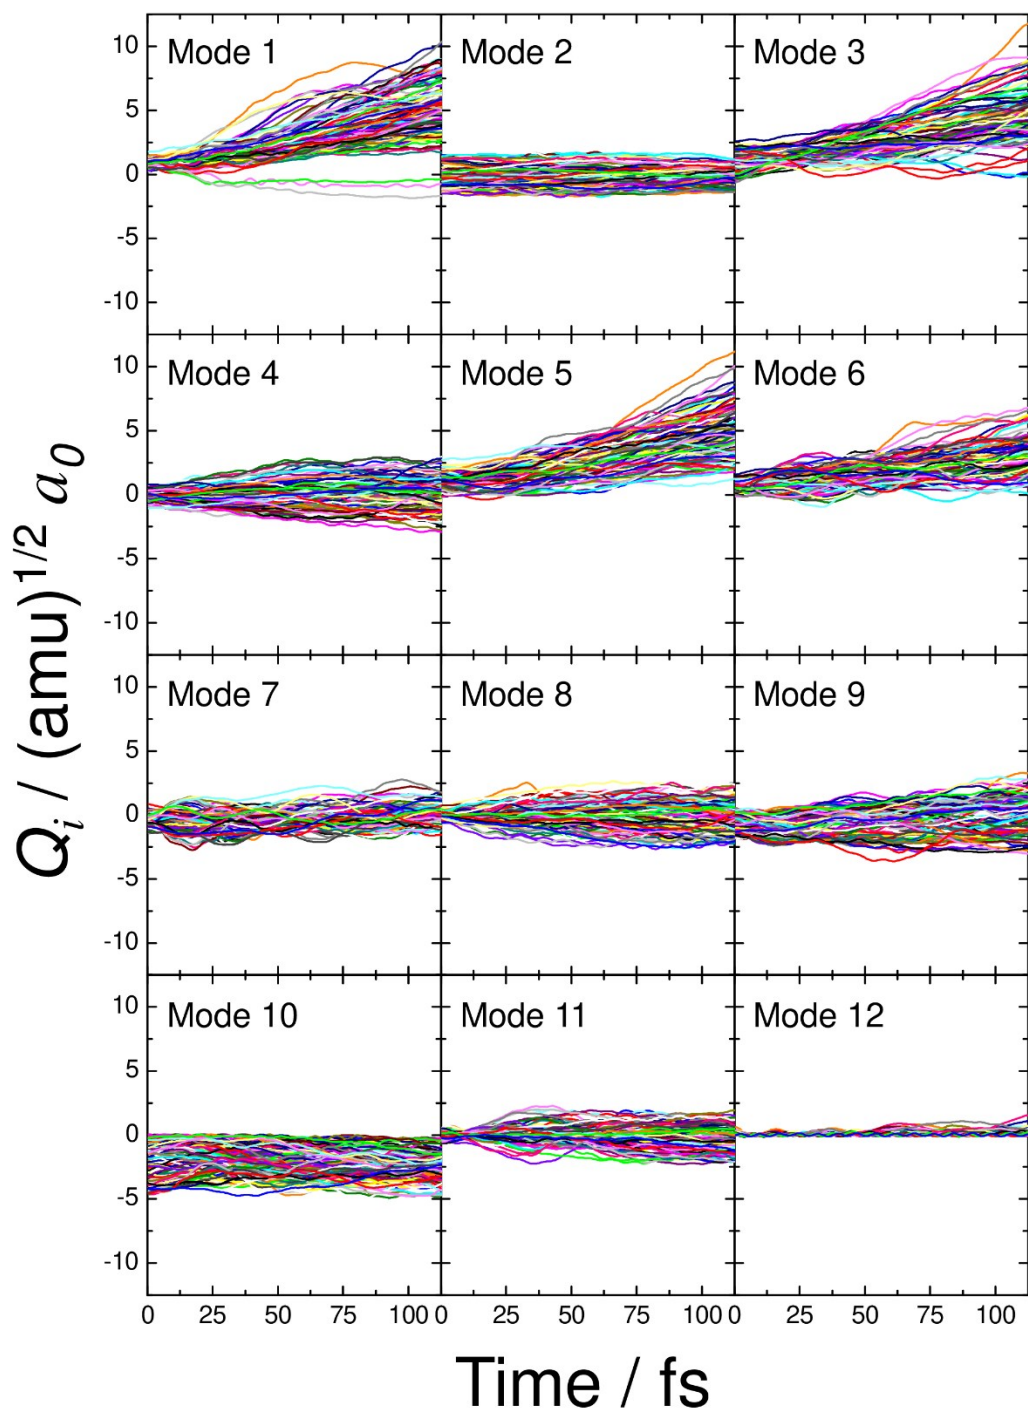

**Figure S2** Time-dependence of the 12 normal mode coordinates along the 100 RPMD trajectories calculated at  $T = 300$  K.

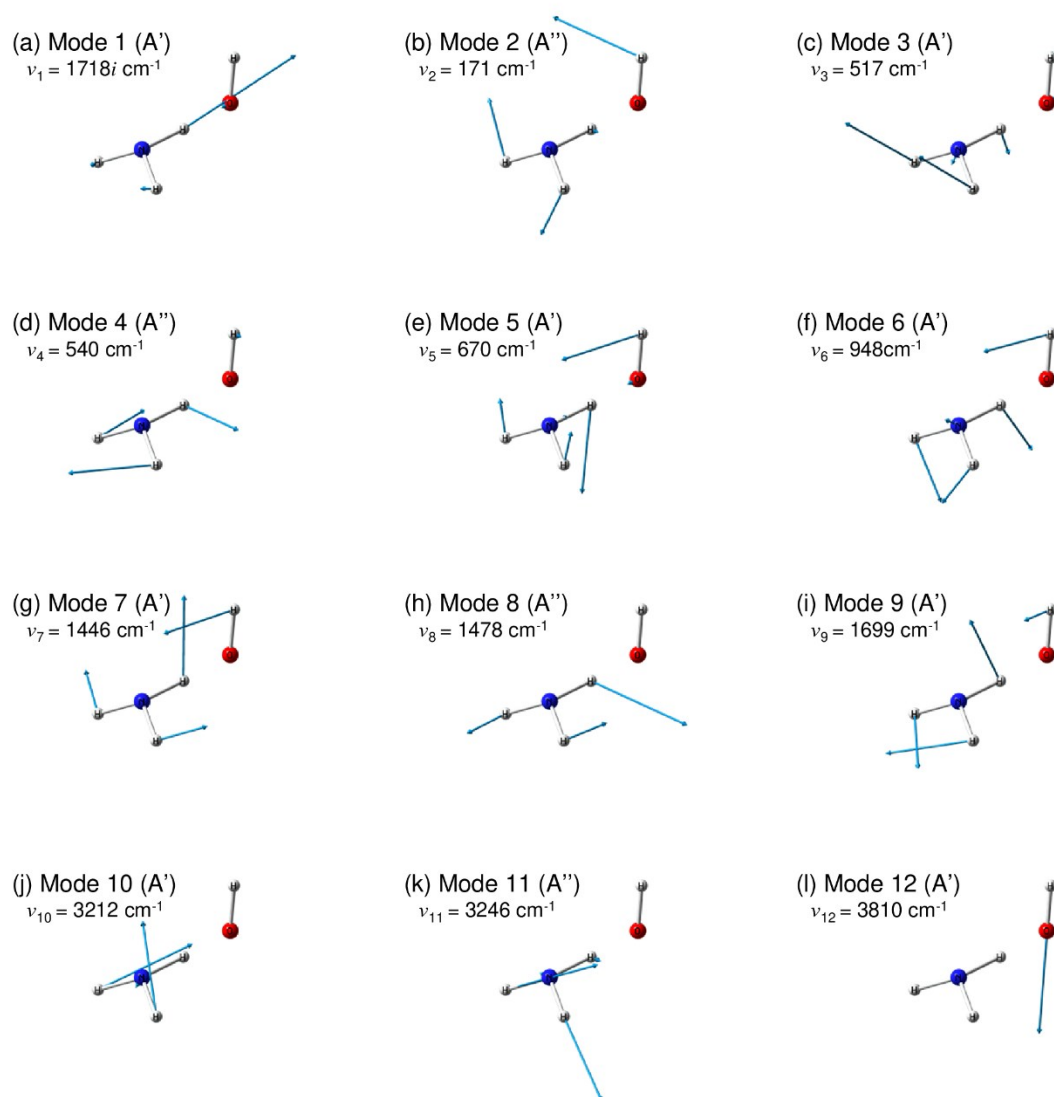

**Figure S3** Normal-mode coordinates obtained from vibrational frequency analysis of the transition-state structure (with anti-configuration) for the  $\text{OH} + \text{NH}_3 \rightarrow \text{H}_2\text{O} + \text{NH}_2$  reaction on the PES-2012 potential energy surface. Mode 1 corresponds to the vibrational mode with an imaginary frequency.

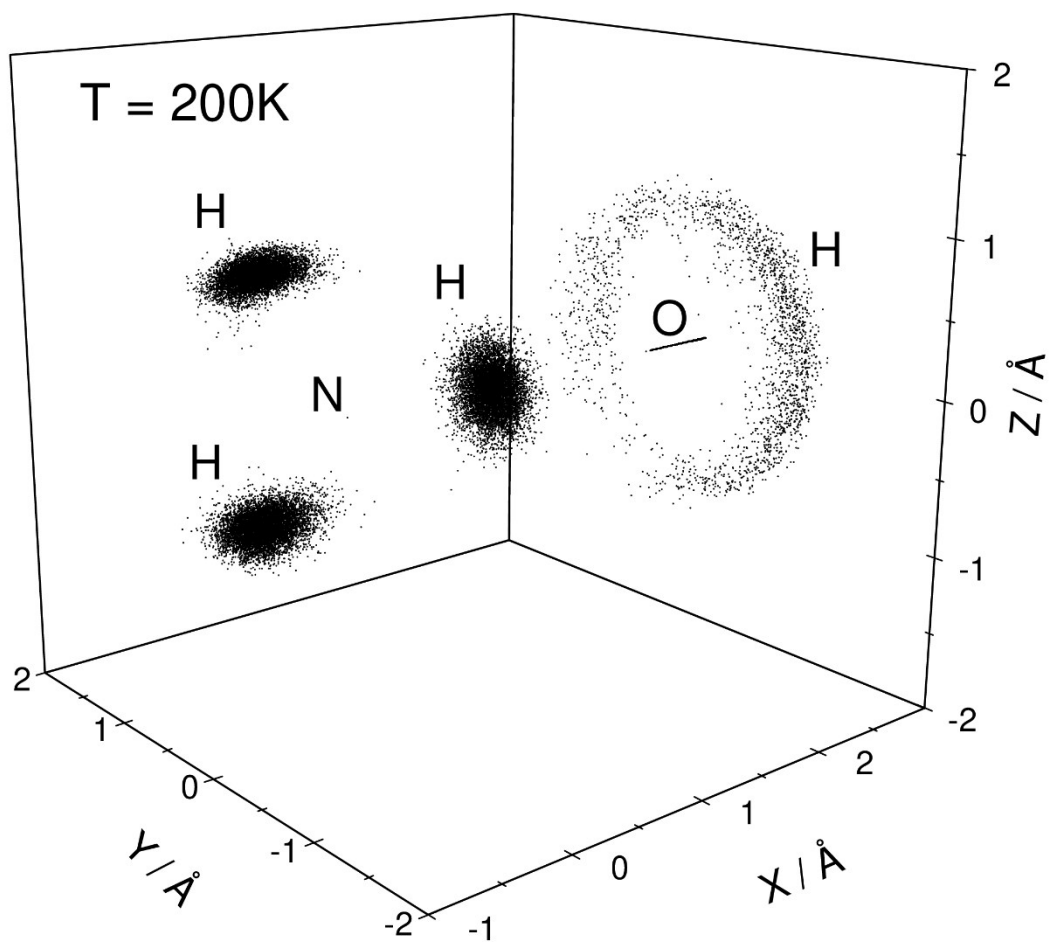

**Figure S4** Three-dimensional perspective plot of the nuclear probability distribution functions of the  $\text{OH}^- \cdot \text{NH}_3$  anion calculated from the PIMD simulations at  $T = 200$  K on the interpolated potential energy surface. In this plot, the nitrogen atom is fixed to the coordinate origin and the oxygen atom is always placed on the X-axis. In addition, the midpoint of the two hydrogen atoms (bonding to N) is placed on the X-Y plane.

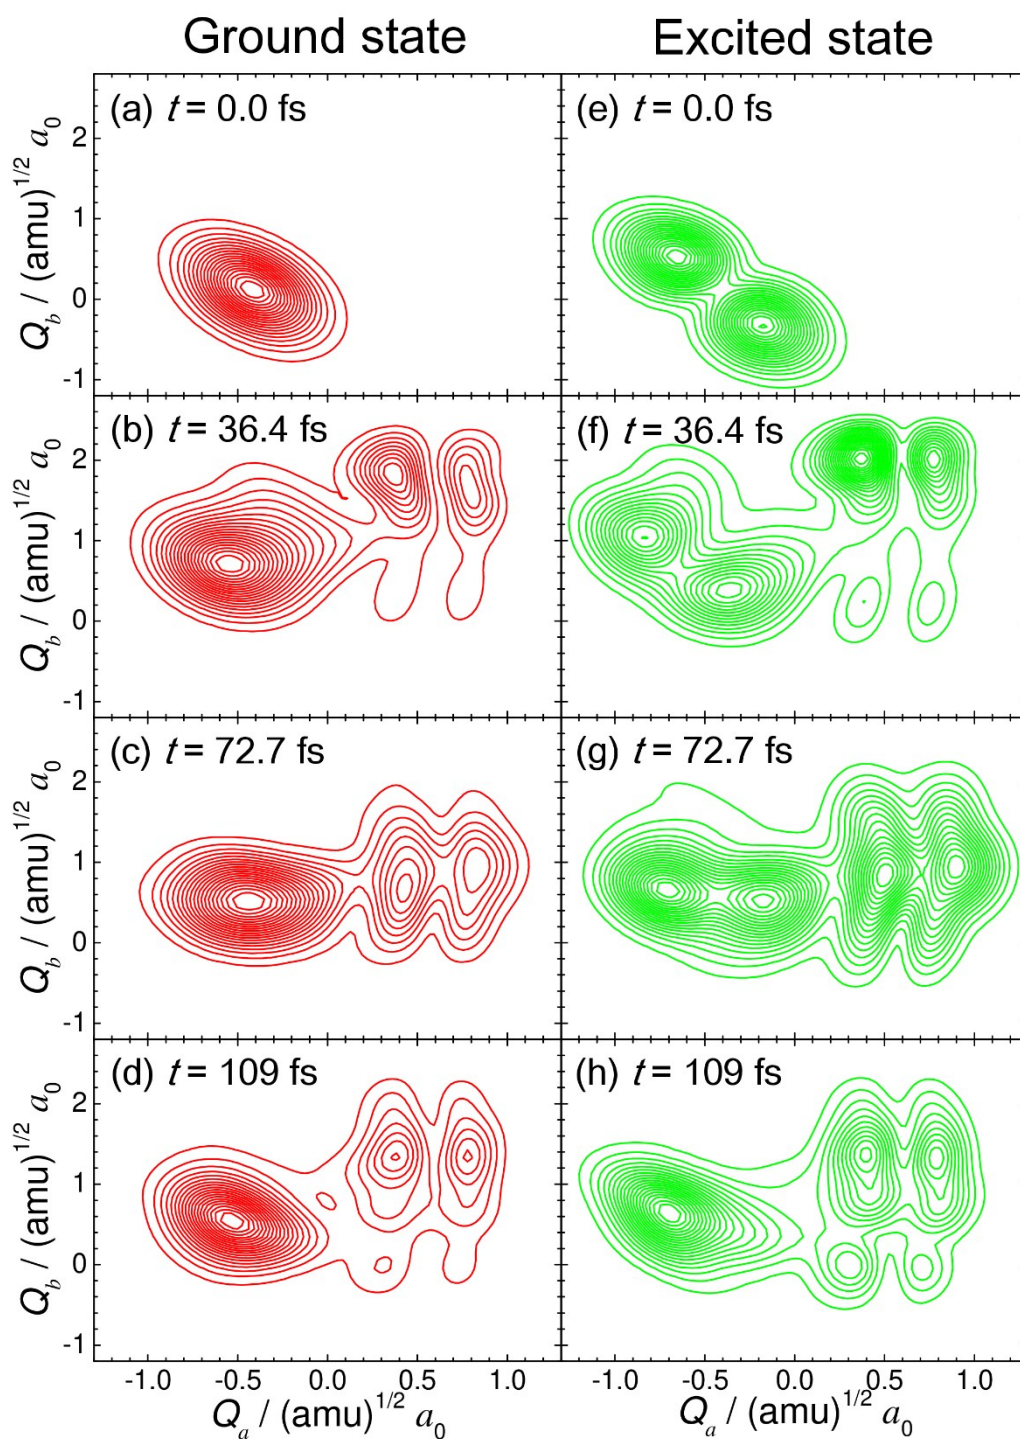

**Figure S5** Time evolution of the wave packet density for the  $\text{OH} + \text{NH}_3 \rightarrow \text{H}_2\text{O} + \text{NH}_2$  reaction system plotted as a function of  $Q_a$  and  $Q_b$ . The wave packet density was integrated over the  $Q_c$  and  $Q_d$  coordinates. Left and right panels show the wave packet evolutions for the (0000) and (1000) initial anionic states, respectively.



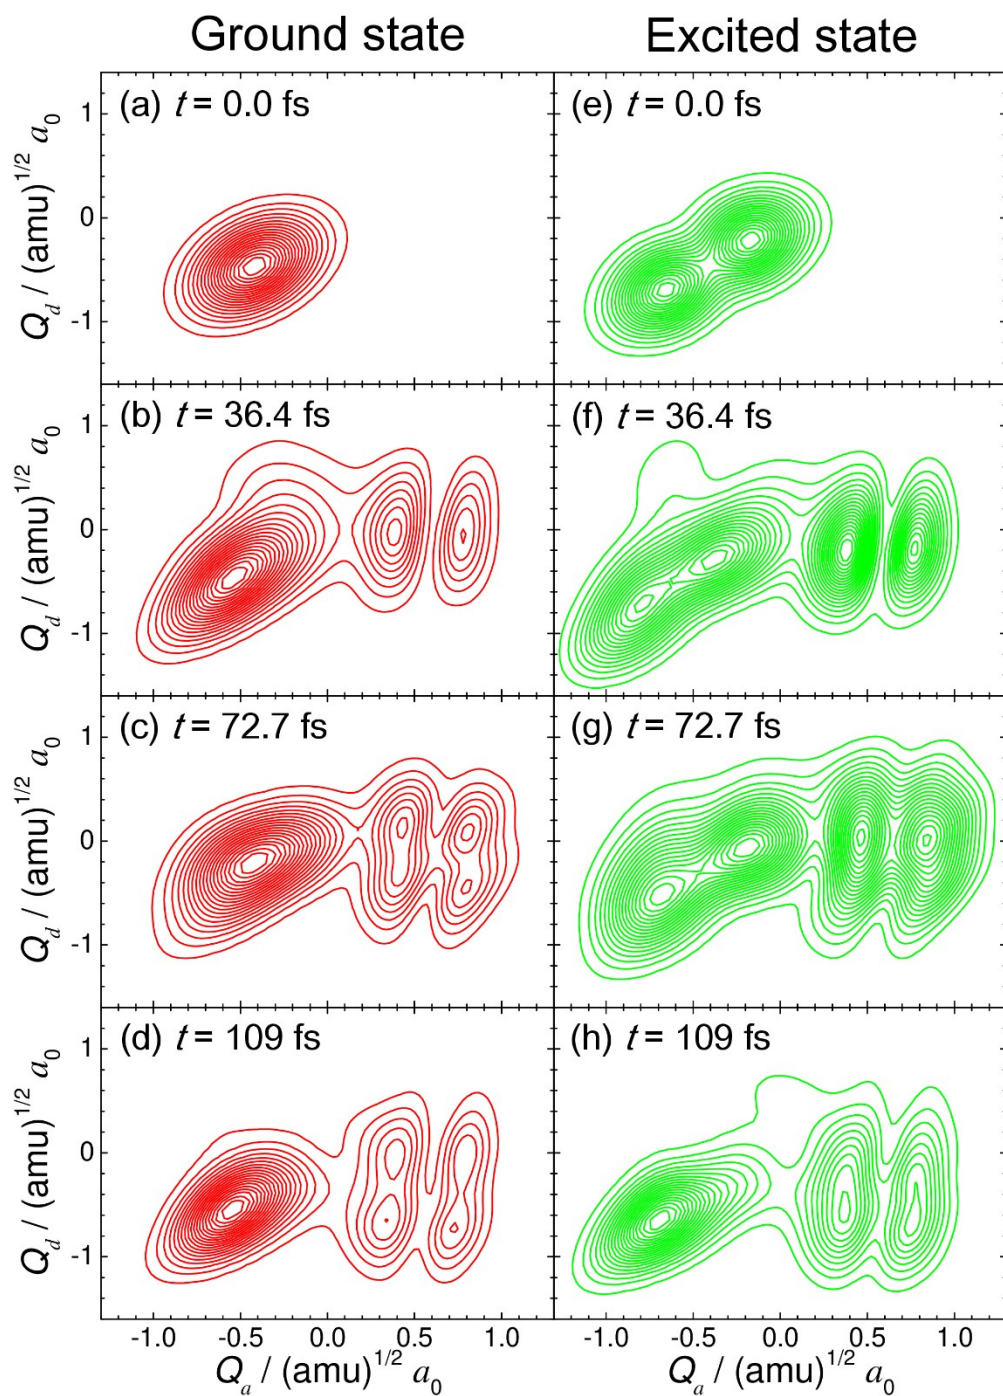

**Figure S6** Time evolution of the wave packet density for the  $\text{OH} + \text{NH}_3 \rightarrow \text{H}_2\text{O} + \text{NH}_2$  reaction system plotted as a function of  $Q_a$  and  $Q_d$ . The wave packet density was integrated over the  $Q_b$  and  $Q_c$  coordinates. Left and right panels show the wave packet evolutions for the (0000) and (1000) initial anionic states, respectively.
